# Supplementary material
Source: Springer Nature journal article supplement (https://www.springermedizin.de/resource/supplementary/13561_2012_57_MOESM2_ESM.pdf/9687376)

Probability that observed value was above predicted value

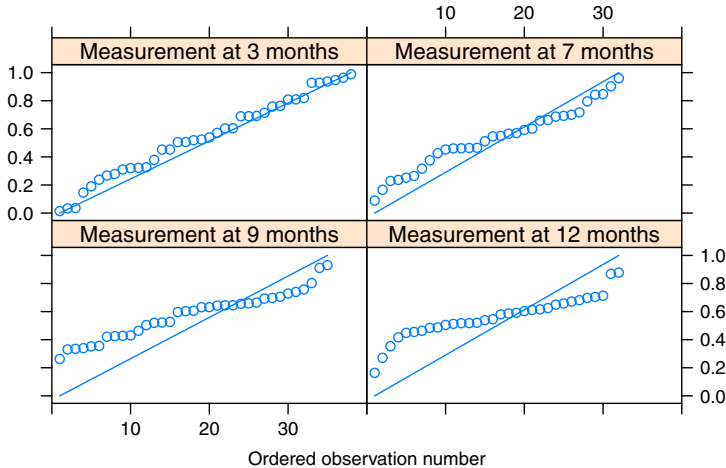

Supplement: MOESM2 [file 9687376]
